# Supplementary material for: Links between central CB1-receptor availability and peripheral endocannabinoids in patients with first episode psychosis
Source: Springer Nature journal article supplement (doi:10.1038/s41537-020-00110-7), 2020-08-26
Supplement: MOESM1 [file 41537_2020_110_MOESM1_ESM-1.pdf]

**Links between central CB1-receptor availability and peripheral endocannabinoids in patients with first episode psychosis**

Alex M. Dickens *et al.*

***Supplementary Material***

**Supplementary Table 1.** Tandem MS analysis of endocannabinoids. Information on quantification and selective reaction monitoring (SRM) transitions for identification.

| Compound | Ionization | Ion Type   | Retention |                   | SRM (amu)            | CE (eV) |
|----------|------------|------------|-----------|-------------------|----------------------|---------|
|          |            |            | Time      | Internal Standard |                      |         |
| THC-COOH | Negative   | Quantifier | 1.23      | THC-COOH d9       | 343.400 →<br>245.100 | -32     |
| THC-COOH | Negative   | Qualifier  | 1.23      | THC-COOH d9       | 343.400 →<br>299.000 | -32     |
| PEA      | Positive   | Quantifier | 3.13      | AEA-d8            | 300.400 → 62.100     | 19      |
| PEA      | Positive   | Qualifier  | 3.13      | AEA-d8            | 300.400 →<br>283.100 | 19      |
| 1-AG     | Positive   | Quantifier | 3.24      | 2-AG d5           | 379.300 →<br>287.300 | 21      |
| 1-AG     | Positive   | Qualifier  | 3.24      | 2-AG d5           | 379.300 →<br>203.200 | 21      |
| 2-AG     | Positive   | Quantifier | 2.97      | 2-AG d5           | 379.300 →<br>287.300 | 21      |
| 2-AG     | Positive   | Qualifier  | 2.97      | 2-AG d5           | 379.300 →<br>203.200 | 21      |
| 2-AGe*   | Positive   | Quantifier | 3.23      | 2-AG d5           | 365.400 →<br>273.200 | 20      |
| 2-AGe*   | Positive   | Qualifier  | 3.23      | 2-AG d5           | 365.400 →<br>121.000 | 20      |
| NADA*    | Positive   | Quantifier | 2.69      | NADA d8           | 440.300 →<br>137.100 | 30      |
| NADA*    | Positive   | Qualifier  | 2.69      | NADA d8           | 440.300 →<br>154.100 | 30      |
| AEA      | Positive   | Quantifier | 2.26      | AEA-d8            | 348.300 → 62.100     | 32      |
| AEA      | Positive   | Qualifier  | 2.26      | AEA-d8            | 348.300 →<br>133.100 | 32      |
| OEA      | Positive   | Quantifier | 3.61      | AEA-d8            | 326.300 → 62.100     | 20      |
| OEA      | Positive   | Qualifier  | 3.61      | AEA-d8            | 326.300 →<br>309.300 | 20      |
| AA       | Negative   | Quantifier | 4.48      | AA-d8             | 303.300 →<br>259.100 | -20     |
| AA       | Negative   | Qualifier  | 4.48      | AA-d8             | 303.300 → 58.900     | -20     |
| SEA      | Positive   | Quantifier | 5.92      | AEA-d8            | 328.400 → 62.100     | 23      |
| SEA      | Positive   | Qualifier  | 5.92      | AEA-d8            | 328.400 →<br>311.400 | 23      |

\*Analyte below limit of detection in study samples.

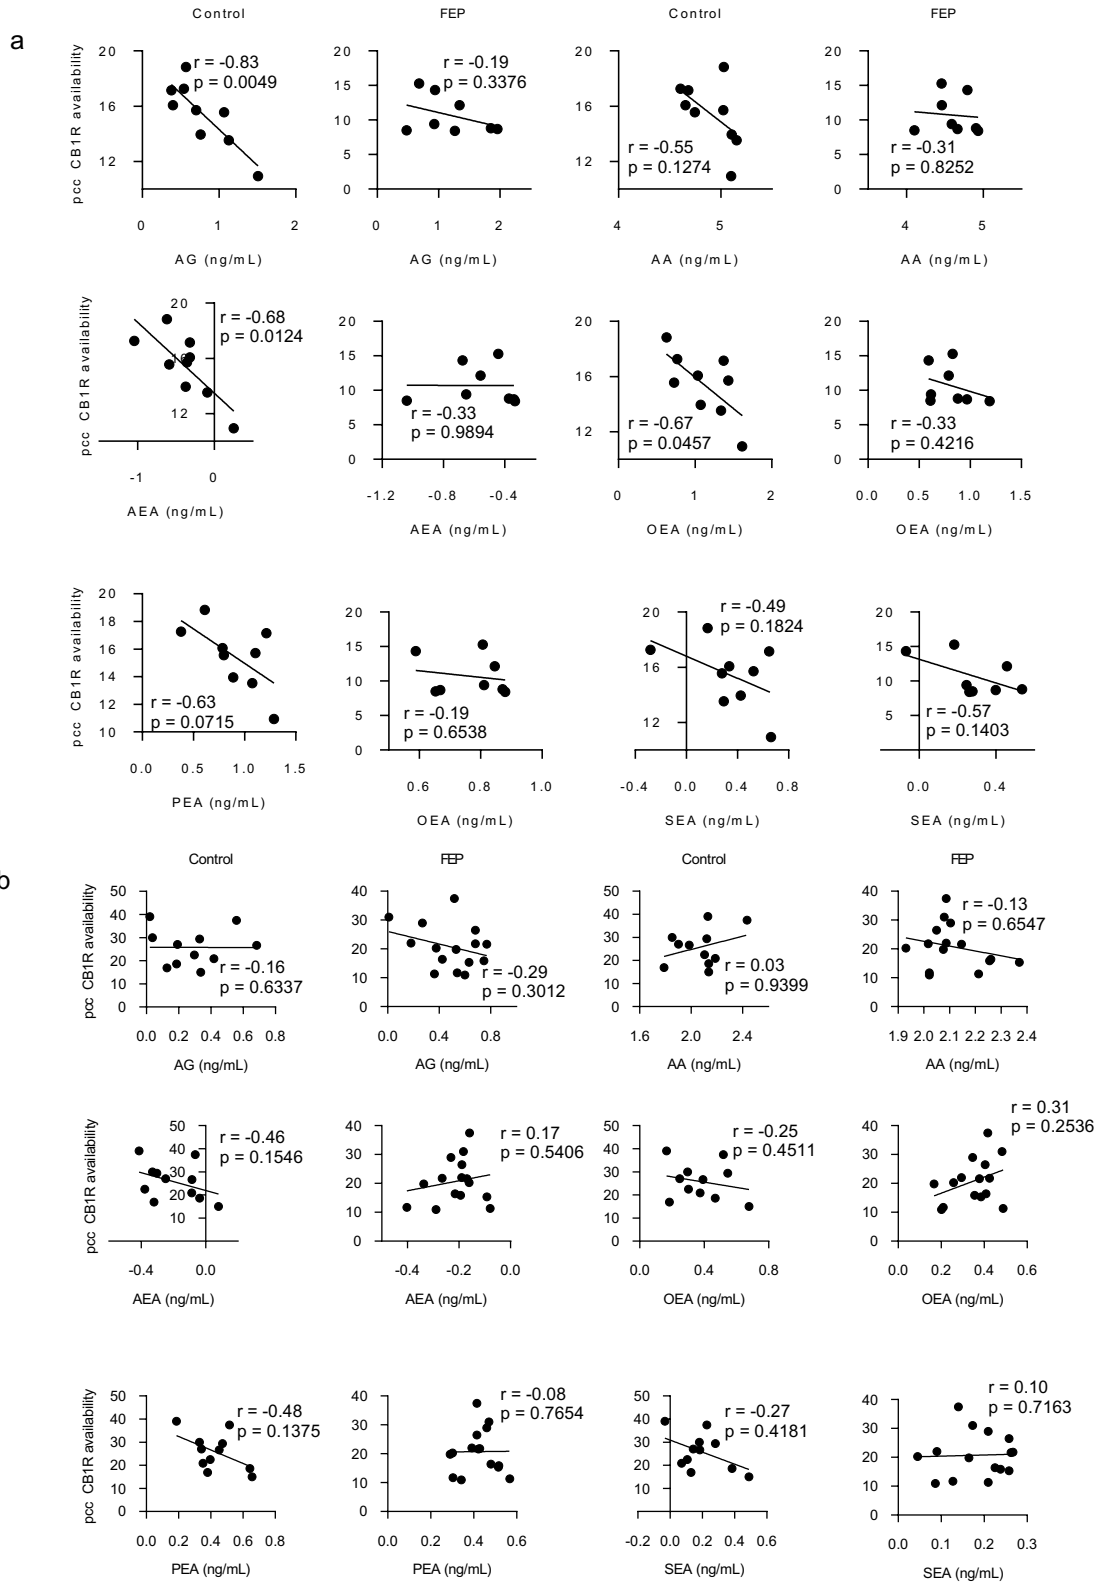

**Supplementary Figure 1.** CB1R availability in the posterior cingulate cortex (PCC) versus the circulating levels of endocannabinoids in Turku and London cohorts.

**(a)** Scatter plots fitted with a linear regression model of CB1R availability in the posterior cingulate cortex (PCC) versus the log-transformed circulating levels of endocannabinoids from the Turku cohort. **(b)** Scatter plots fitted with a linear regression model of CB1R availability in the posterior cingulate cortex (PCC) versus the log-transformed circulating levels of endocannabinoids from the London cohort. The line shows the linear model for each dataset.
